# Supplementary material for: Longitudinal Association of Frailty Levels with Knee Osteoarthritis in middle-aged and elderly Chinese: A longitudinal cohort study
Source: Research Square preprint supplement (doi:10.21203/rs.3.rs-6644320/v1), 2025-05-30
Supplement: Supplementary file 1 [file a61b090da0b2e9d743799824.docx]

**Supplementary Table 1. Selection of items to calculate frailty score**

| Items | Categorization |
| --- | --- |
| Ⅰ. Physical/ADL/IADL limitations (n=18) |  |
| Difficulty with walking 100 Metres. | 0=did not have any problems with the activity; 1=some difficulty with the activity or could not do the activity. |
| Difficulty with controlling urination and defecation. |
| Difficulty with getting up from chair after sitting for long periods. |
| Difficulty with climbing several flights of stairs without resting. |
| Difficulty with stooping, kneeling,or crouching. |
| Difficulty with reaching or extending arms above shoulder level. |
| Difficulty with lifting or carrying weights over 10 Jin (5kg). |
| Difficulty with picking up a small coin from a table. |
| Difficulty with dressing. |
| Difficulty with bathing or showering. |
| Difficulty with eating. |
| Difficulty with getting out of bed and walking. |
| Difficulty with using the toilet, including getting up or down. |
| Difficulty with managing money. |
| Difficulty with taking medications. |
| Difficulty with shopping for groceries. |
| Difficulty with preparing a hot meal. |
| Difficulty with cleaning house. |
| Ⅱ. CES-D (n=10) |  |
| Felt depressed much of the time during the past week. | 0=Rarely or none of the time; 1= Some or a little of the time/ Occasionally or a moderate amount of the time/ Most or all of the time. |
| Felt sleep was restless. |
| Was not happy most of the time. |
| Felt lonely. |
| Bothered by little things. |
| Could not get going. |
| Had trouble keeping mind on what is doing. |
| Felt fearful. |
| Felt everything they did during the past week was an effort. | 0=Most or all of the time; 1=Some or a little of the time/ Occasionally or a moderate amount of the time/ Rarely or none of the time. |
| Felt hopeful about the future. |
| Ⅲ. Comorbidities (n=13) |  |
| Hypertension. | 0=never diagnosed; 1=ever diagnosed. |
| Diabetes. |
| Lung disease. |
| Heart problem. |
| Stroke. |
| Psych problem. |
| Arthritis. |
| Dyslipidemia. |
| Liver disease. |
| Kidney disease. |
| Stomach/digestive disease. |
| Asthma. |
| Memory problem. |
| Ⅳ. History of trauma (n=2) |  |
| Fractured hip. | 0=never experienced; 1=ever experienced. |
| Fallen down. |
| Ⅴ. Cognition (n=4) |  |
| Cannot answer correct month given. | 0=can correctly answer; 1=cannot correctly answer. |
| Cannot answer correct year given. |
| Cannot answer correct day given. |
| Numeracy. |
| Ⅵ. Others (n=4) |  |
| Hearing problem. | 0=never had; 1=ever had. |
| Eyesight problem. |
| Self reported pain. | 0=never troubled with any body pains; 1=a little/ somewhat/ quite a bit/ very often troubled with body pains. |
| Self reported health. | 0=very good/ good; 1=fair/ poor/ very poor. |

*The frailty index was calculated by summing the number of deficits reported by the respondents and dividing by the total number of possible (answered) deficits. Then, a frailty index with a potential range from 0 to 1 was generated, with a higher score indicating more serious frailty.

###### Supplementary Table 2. Information About Exposures, Outcomes, and Covariates

| Exposures: Frailty (yes or no) and frailty index.  Outcomes: Knee osteoarthritis (yes or no)  Covariates:   - Gender (male vs. female) - Age at baseline (CHARLS 2011) - Smoking status (non-smoker, ex-smoker, current smoker) - Alcohol drinker status (non-drinker, ex-drinker, current drinker) - Education based on the college/university degree (yes or no) - Body mass index (BMI) based on the ranges established by the World Health Organization (WHO). BMI was then categorized as underweight (<18.5 kg/m2), normal (18.5–24.9 kg/m2), overweight (25.0–29.9 kg/m2), or obese (≥30.0 kg/m2) based on the ranges established by the World Health Organization (WHO). - The residential area was categorized as either “rural” or “urban” and confirmed based on household and community IDs recorded in CHARLS. |
| --- |

###### Supplementary Table 3. Associations of **Frailty** and **Frailty index** with the Risk for Prevalent KOA in the CHARLS cohorts excluded KOA **at baseline**.

| **Outcome** | **Expose** | **Total NO. of Participants (%)** | **NO. of KOA cases (%)** | **Model 1 OR (95% Cl)** | **Model 2 OR (95% Cl)** |
| --- | --- | --- | --- | --- | --- |
| **KOA** | **Frailty** | | |  |  |
|  | No | 9432(89.3%) | 621 (79.8%) | 1 (reference) | 1 (reference) |
|  | Yes | 1121(10.7%) | 157 (20.2%) | 2.31 (1.92-2.79) | 2.07 (1.70-2.51 |
|  | P for trend |  |  | **2.00×10**-16 | **2.00×10**-16 |
|  | Frailty index | | | | |
|  | Quartile 1 | 2757 (26.2) | 93 (12%) | 1 (reference) | 1 (reference) |
|  | Quartile 2 | 2765 (26.2) | 158 (20.3%) | 1.74 (1.34-2.26) | 1.70 (1.30-2.21 |
|  | Quartile 3 | 2853 (27.0) | 244 (31.4%) | 2.68 (2.10-3.42) | 2.52 (1.96-3.23 |
|  | Quartile 4 | 2178 (20.6) | 283 (36.4%) | 4.28 (3.36-5.45) | 3.92 (3.04-5.04 |
|  | P for trend |  |  | **2.00×10**-16 | **2.00×10**-16 |

Quartiles: Patients were divided into 4 quartiles, quartiles 1-4 (Q1-4) based on nine adiposity-related markers measures across quartiles.

Model 1: (crude model) was unadjusted;

Model 2: adjusted for age, sex, BMI, smoking status, drinking status, race, education, location, marital, regular physical activity.

Abbreviations: OR, Odds Ratio; CI, Confidence Interval; KOA, Knee Osteoarthritis.

Bold indicates statistical significance at the p < 0.05 level.
